# Supplementary material for: A high-performance flexible SnS photothermoelectric photodetector for temperature sensing function
Source: Royal Society of Chemistry journal article supplement (doi:10.1039/d4tc03507k), 2024-01-01
Supplement: d4tc03507k1.pdf [file d4tc03507k1.pdf]

## Supporting Information

### High-performance flexible SnS photothermoelectric

### photodetector for temperature sensing function

Bo Zhang,<sup>a</sup> Yunjie Liu,<sup>b</sup> Bing Hu,<sup>a</sup> Fuhai Guo,<sup>a</sup> Mingcong Zhang,<sup>a</sup> Shuangshuang Li,  
<sup>a</sup> Ankai Sun, Jianyu Jiang<sup>a</sup> and Lanzhong Hao<sup>\*a</sup>

a. School of Materials Science and Engineering, China University of Petroleum, Qingdao, Shandong 266580, P. R. China.

b. College of Science, China University of Petroleum, Qingdao, Shandong 266580, P. R. China. \* Address correspondence to (L. Hao): haolanzhong@upc.edu.cn.

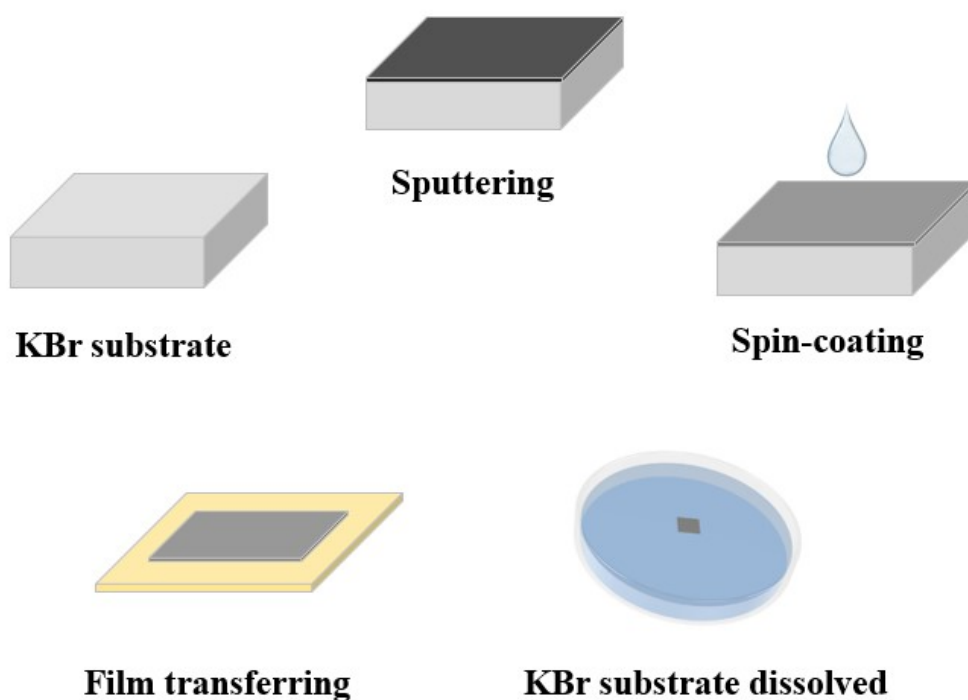

S1 Flowchart for film preparation and transfer.

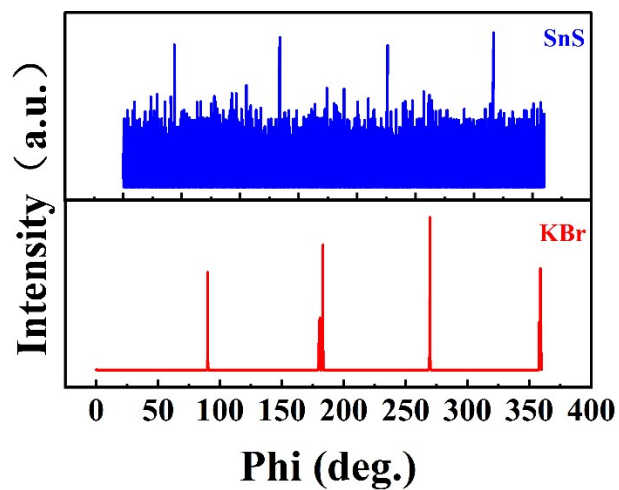

S2 In-plane phi scan of the SnS film.

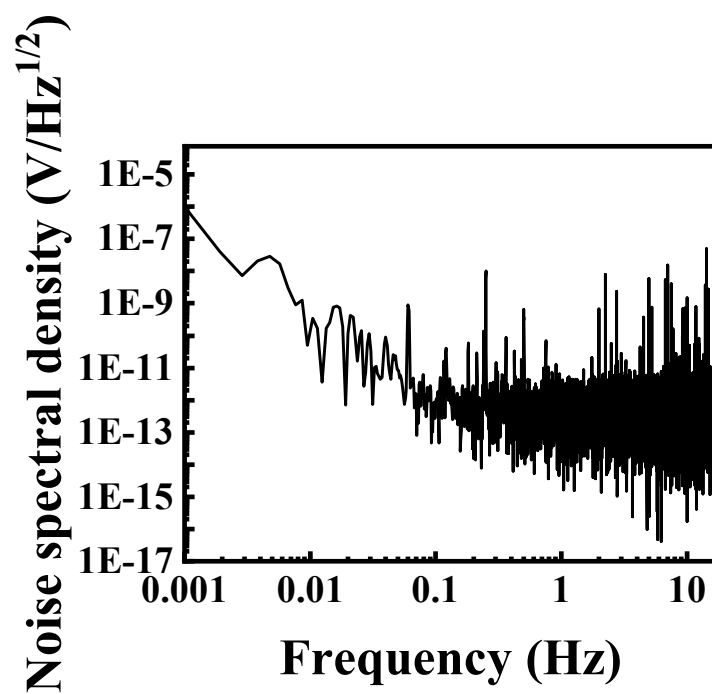

S3 1/f noise spectrum of SnS thin film PDs.

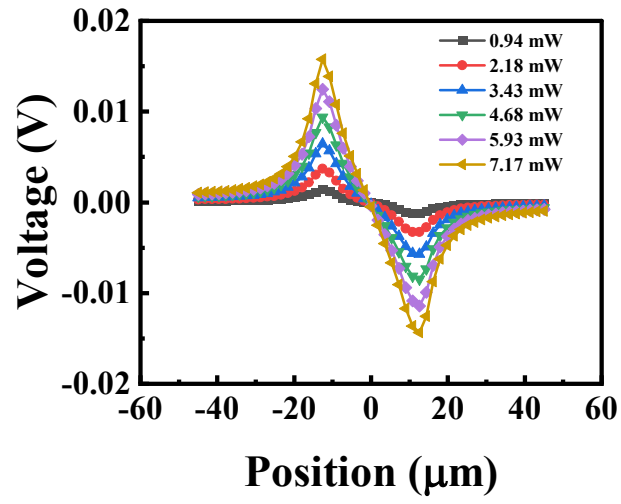

S4 Position-photovoltage curve under 405nm laser.
